# Supplementary material for: Dosage compensation is less effective in birds than in mammals
Source: PubMed Central journal article supplement (PMC2373894; doi:10.1186/jbiol53), 2007-03-22
Supplement: jbiol53-S1.pdf [file jbiol53-S1.pdf]

**Table 4: Male to female ratios of expression of all genes in zebra finch**

Genes differing between the sexes \*p&lt;0.05, \*\*p&lt;0.01, \*\*\* p&lt;0.001.

| Symbol      | Genbank  | Category | Adult<br>brain |     | Kidney |     | Liver |   | P1<br>brain |
|-------------|----------|----------|----------------|-----|--------|-----|-------|---|-------------|
|             | DV958862 | A        | 1.598          |     | 0.853  |     | 0.93  |   | 1.093       |
| MCCC2       | CK310795 | A        | 1.547          | *   | 1.583  | *** | 1.678 |   |             |
| PPIA        | CK310626 | A        | 1.515          |     | 0.957  |     |       |   |             |
| DAX1        |          | A        | 1.458          |     | 1.083  |     | 1.271 |   | 1.321       |
| APBA1       | DV955138 | A        | 1.354          | *   | 0.996  |     |       |   | 1.228       |
| SEPP1       | CK306804 | A        | 1.318          |     | 0.948  |     | 0.889 |   | 1.106       |
| CPLX2       | CK314517 | A        | 1.272          |     | 1.182  |     | 0.789 |   | 1.268       |
| TRPM7       | DV961757 | A        | 1.249          | **  | 1.178  |     | 1.268 |   | 1.13        |
| UBAP2L      | CK314627 | A        | 1.234          | *** | 1.166  |     | 1.156 |   | 1.325 *     |
| RIOK2       | CK310447 | A        | 1.193          |     | 1.023  |     | 0.912 |   | 1.273 **    |
| WNT4        |          | A        | 1.192          |     | 0.98   |     |       |   |             |
| AR          | AY847476 | A        | 1.187          |     | 0.976  |     | 1.078 |   |             |
| DIAPH1      | DV951868 | A        | 1.181          |     | 0.977  |     | 1.014 |   | 0.939       |
| WDR51A      | CK304055 | A        | 1.172          |     | 0.923  |     | 1.04  |   | 1.189 *     |
|             | CK305660 | A        | 1.168          | *** | 1.066  | *   | 0.94  |   | 1.154 ***   |
| PCSK5       | DV955703 | A        | 1.165          |     | 1.1    |     | 1.108 |   |             |
| SOX9        |          | A        | 1.1            |     | 1.022  |     |       |   |             |
| PRKACB      | DV959612 | A        | 1.079          |     | 0.988  |     | 0.966 |   |             |
| LPL         | CK313328 | A        | 1.074          |     | 1.273  |     |       |   |             |
| RBM8B       | CK307579 | A        | 1.066          |     | 1.008  |     | 0.861 |   | 0.906       |
| cyclophilin |          | A        | 1.065          | *   | 0.892  |     | 0.84  |   | 1.02        |
| COMMD10     | CK311766 | A        | 1.046          |     | 1.104  | *   | 1.078 |   | 0.933       |
| ALDH1A2     |          | A        | 1.043          |     | 1.164  |     | 0.89  |   |             |
| FRMD5       | CK307621 | A        | 1.039          |     | 0.924  |     | 0.64  | * | 0.893       |
|             | CK303865 | A        | 1.039          |     | 1.014  |     | 1.012 |   | 1.038       |
| SLC1A3      | DV945569 | A        | 1.016          |     | 1.055  |     |       |   | 1.067       |
| SMAD1       | CK317055 | A        | 1.005          |     | 0.825  |     | 1.202 |   | 1.132       |
| ST8SIA2     | DV957129 | A        | 1.003          |     | 0.902  |     | 1.077 |   | 0.862       |
| THBS4       | DV951570 | A        | 0.999          |     | 0.88   |     | 0.844 |   | 1.03        |
| GRIN1       |          | A        | 0.991          |     | 0.878  |     | 0.935 |   | 1.139       |
| NFIC        | CK305719 | A        | 0.991          |     | 1.011  |     | 1.087 |   | 0.932       |
| HBLD2       | CK309932 | A        | 0.99           |     | 0.971  |     | 0.937 |   | 0.884       |
| ACOT12      | DV951929 | A        | 0.989          |     | 1.242  |     |       |   |             |
| RSBN1       | DV955847 | A        | 0.989          |     | 0.961  |     | 0.909 |   | 0.914       |
|             | CK310834 | A        | 0.988          |     | 1.143  |     | 0.997 |   | 0.992       |
| RORA        | CK313162 | A        | 0.988          |     | 1.02   |     |       |   | 0.969       |
| GPBP1L1     | DV960486 | A        | 0.986          |     | 1.155  |     | 1.204 |   | 0.888       |
| NOTCH1      |          | A        | 0.976          |     | 1.014  |     | 0.888 |   | 1.147 *     |
| KCNN2       | CK235916 | A        | 0.974          |     | 0.997  |     | 0.882 |   | 0.963       |
| ESR2        |          | A        | 0.972          |     | 1.026  |     | 0.897 |   | 0.873       |
|             | CK235138 | A        | 0.966          |     | 1.098  |     | 0.928 |   | 0.806       |

|         |          |   |       |     |       |     |       |       |     |
|---------|----------|---|-------|-----|-------|-----|-------|-------|-----|
| FBN1    | CK304347 | A | 0.964 |     | 1.039 |     |       |       |     |
| NR5A1   |          | A | 0.961 |     | 0.932 |     | 0.976 | 1.065 | *   |
| ACTB    |          | A | 0.955 |     | 1.01  |     | 1.069 | 1.118 |     |
|         | DV949309 | A | 0.952 |     | 1.046 | *   | 0.906 | 0.881 |     |
|         | CK312665 | A | 0.952 |     | 1.003 |     | 0.884 | 0.905 |     |
| GAPDH   |          | A | 0.949 |     | 0.922 |     | 1.011 | 0.898 |     |
| STOML2  | CK303030 | A | 0.949 |     | 1.129 |     | 0.985 | 0.816 |     |
| TLE3    | DV960301 | A | 0.942 |     | 1.124 |     | 1.205 | 0.955 |     |
|         | DV956418 | A | 0.942 |     | 1.064 | *   | 0.906 | 0.904 |     |
|         | DV950172 | A | 0.942 |     | 1.407 |     | 1.018 | 1.065 |     |
| NRG2    | CK303130 | A | 0.941 |     | 1.098 |     | 0.941 | 0.877 |     |
| MTX1    | DV958545 | A | 0.941 |     | 0.968 |     | 0.96  | 0.913 |     |
|         | CK301734 | A | 0.931 |     | 1.091 |     | 0.879 | 0.857 |     |
|         | CK305333 | A | 0.931 |     | 1.071 | *   | 0.96  | 0.936 |     |
| ARL1    | CK303730 | A | 0.929 |     | 1.086 |     | 0.936 | 0.973 |     |
| TJP1    | CK302684 | A | 0.926 |     |       |     |       |       |     |
| MAP1B   | DV954903 | A | 0.924 |     | 1.127 | *   | 0.981 | 0.924 |     |
|         | CK312665 | A | 0.919 |     | 0.956 |     | 0.933 | 0.865 |     |
| SFRS11  | CK305197 | A | 0.917 |     | 0.995 |     | 0.915 | 0.943 |     |
|         | DV952782 | A | 0.914 |     | 0.983 |     |       |       |     |
| HSPB1   | CK311542 | A | 0.913 |     | 1.001 |     |       |       |     |
| SOX3    | DQ206644 | A | 0.912 |     | 0.949 |     | 0.963 |       |     |
|         | CK312123 | A | 0.907 |     | 1.128 |     | 0.988 | 0.957 |     |
| RASA1   | CK309014 | A | 0.901 |     | 1.038 |     | 0.882 | 0.798 | *   |
|         | CK317038 | A | 0.9   |     | 0.975 |     | 0.865 | 1.058 |     |
| HDGF    | CK301933 | A | 0.892 |     | 1.228 |     |       | 1.052 |     |
| CKMT1B  | DV945274 | A | 0.874 |     | 0.935 |     | 1.064 | 0.829 |     |
| SH3GL3  | CK311369 | A | 0.809 | *   | 1.159 |     |       | 0.901 |     |
| VCP     | DV951025 | A | 0.733 | *** | 0.802 |     | 0.726 | 0.661 | **  |
| GNG11   | CK305961 | A |       |     |       |     |       | 0.976 |     |
| DCX     | DQ189989 | A |       |     | 0.926 |     |       | 1.105 |     |
|         | DV946578 | A |       |     | 0.999 |     |       |       |     |
| BDNF    |          | A |       |     | 1.065 |     |       |       |     |
| XPA     | DV954690 | A |       |     | 1.118 |     |       |       |     |
| GATA4   |          | A |       |     |       |     |       |       |     |
| GAS1    | DV958631 | A |       |     |       |     |       |       |     |
| LHX9    |          | A |       |     |       |     |       |       |     |
| NANS    | CK302389 | A |       |     |       |     |       |       |     |
| NGFB    |          | A |       |     |       |     |       |       |     |
| TGFB3   |          | A |       |     |       |     |       |       |     |
| WT1     |          | A |       |     |       |     |       |       |     |
| ESR1    |          | A |       |     |       |     |       |       |     |
| CYP19A1 |          | A |       |     |       |     |       |       |     |
| FST     | CK304072 | Z | 1.831 | *** | 1.139 |     | 1.492 | 1.658 | *   |
| RPS6    | CK316148 | Z | 1.661 | *** | 1.71  | *** | 1.761 | 1.565 | *** |
| LUZP1   | CK304237 | Z | 1.612 | **  | 1.089 |     |       | 1.657 | *   |
