# Supplementary material for: Dosage compensation is less effective in birds than in mammals
Source: PubMed Central journal article supplement (PMC2373894; doi:10.1186/jbiol53), 2007-03-22
Supplement: jbiol53-S3.pdf [file jbiol53-S3.pdf]

**Table 6: Primer sequences for Quantitative PCR**

|             | Chicken Affy #                                                                                       | Gene symbol                                                                                                                                       | Primer sequences                                                                                                                                                                                                                                                                                                                                                                                                                                                                                                                        |
|-------------|------------------------------------------------------------------------------------------------------|---------------------------------------------------------------------------------------------------------------------------------------------------|-----------------------------------------------------------------------------------------------------------------------------------------------------------------------------------------------------------------------------------------------------------------------------------------------------------------------------------------------------------------------------------------------------------------------------------------------------------------------------------------------------------------------------------------|
| Zebra finch |                                                                                                      | FST<br>LUZP1<br>SMARCA2<br>DNAJA1<br>CRHBP<br>RPS6<br>GAPDH                                                                                       | 5'-TGCCCGAGGAGTGTAATTCT-3', 5'-GGTGCCACGTCCTACCTTTA-3'<br>5'-CCTGTAGCTGCCAAGGAAGA-3', 5'-AAAGCTTGGCATCTGATGGT-3'<br>5'-GGAGGATGGAGAAAAAGCAA-3', 5'-CCGTCCTGAACTGTCCTTGT-3'<br>5'-ACCGGTGTAAGAGCTGCAAT-3', 5'-ATATCCCCTGGTTCCAGACC-3'<br>5'-GGTGAAAATGACCCCTTCCT-3', 5'-GTTTGCGGTGAAGGTGAACT-3'<br>5'-GAGAAAGCGCAAGTCTGTCC-3', 5'-GTGTCAGTCAGCCCAGGAAT-3'<br>5'-CCATCAACGATCCCTTCATT-3', 5'-TTCCATTCTCAGCCTTGAC-3'                                                                                                                       |
| Chicken     | Gga.12454.1.S1<br>GgaAffx.9524<br>GgaAffx.24493<br>Gga.4811<br>GgaAffx.25289<br>Gga.2433<br>Gga.2883 | <a href="#">MAP1B</a><br><br><a href="#">RASA1</a><br><a href="#">RELB</a><br><a href="#">DHFR</a><br><a href="#">B2M</a><br><a href="#">ACTB</a> | 5'-TTTGGCAGGAATGTGTTGCA-3', 5'-GTTTTCTTCCTCTGCACAGT-3'<br>5'-TCATCCTACTATGTGGTGAG-3', 5'-CATTCCCTCATCACTTCTGA-3'<br>5'-TACTGTTCGGTGTCTTTTCA-3', 5'-TTGAGTACAGTCACTTGGCT-3'<br>5'-CTAGTGAAGAACTGAAGGAG-3', 5'-ACATTACATCTGGTGGACAG-3'<br>5'-TGGAAGGGGTAAATCCATTC-3', 5'-AGATCACGAGATAGGTCAGT-3'<br>5'-GCCTGTTGCAGAAACATTCA-3', 5'-CTGCTGGTTTTTCAGATCAAG-3'<br>5'-TAAAAGCCTGGATGATGCCT-3', 5'-CTTGTCACAAACAGTCGATG-3'<br>5'-CTCCGACATGTCCTTCAACG-3', 5'-CTCGGGATCCCACCTTGTAGA-3'<br>5'-TATTGCTGCGCTCGTTGTTG-3', 5'-GGGCGACCCACGATAGATG-3' |
